# Supplementary material
Source: PubMed Central journal article supplement (PMC6708790)

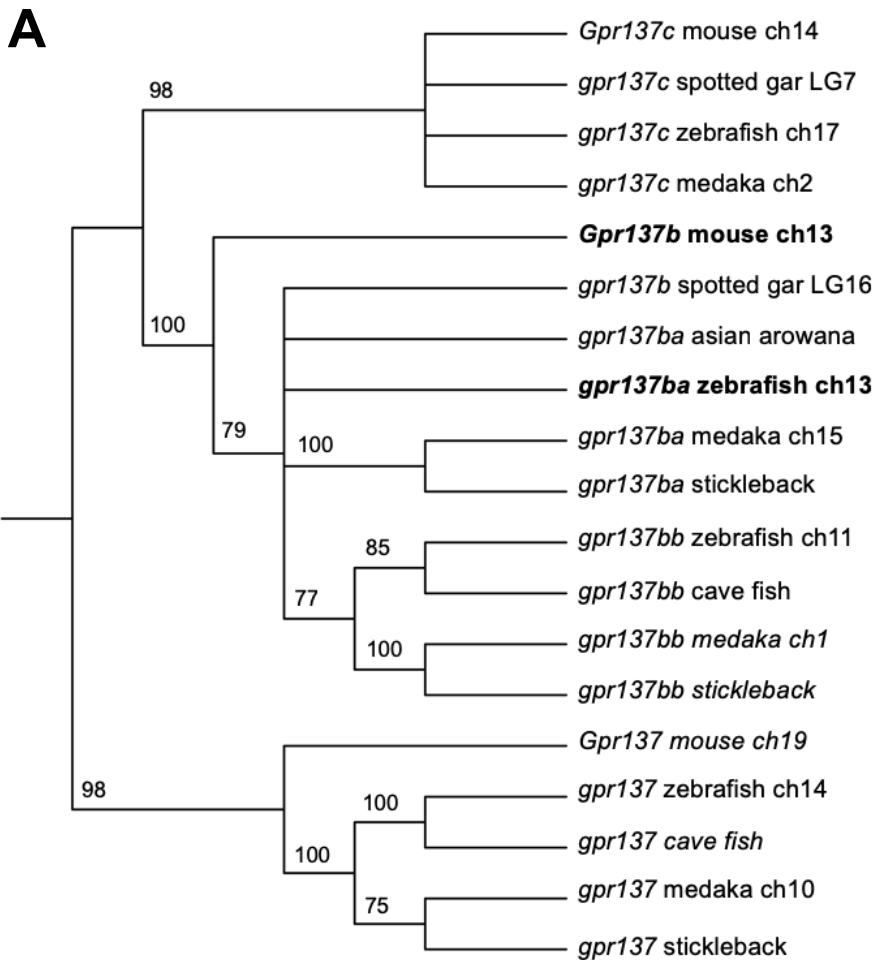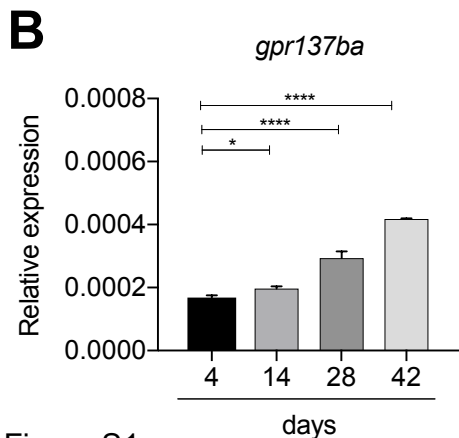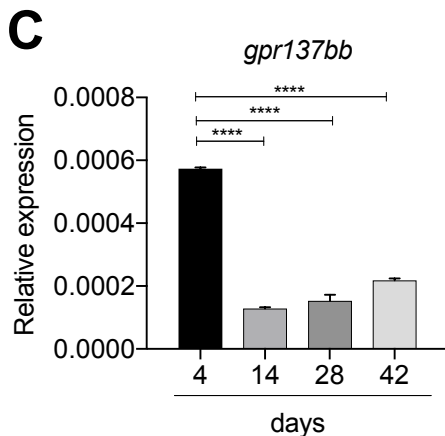

Figure S1

**A**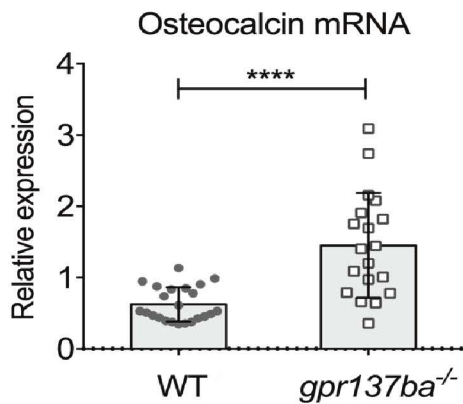**B**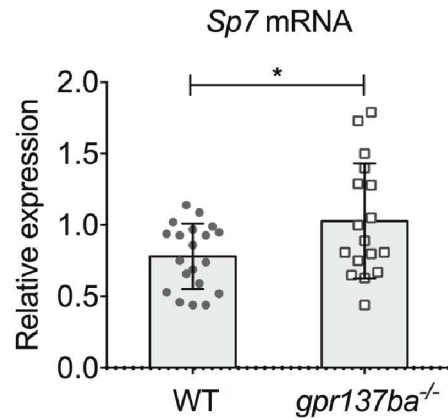**C**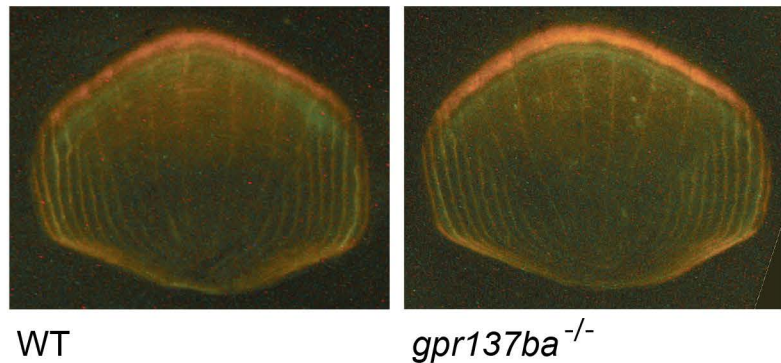**D**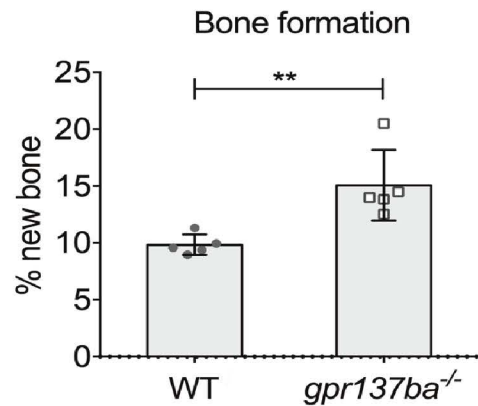

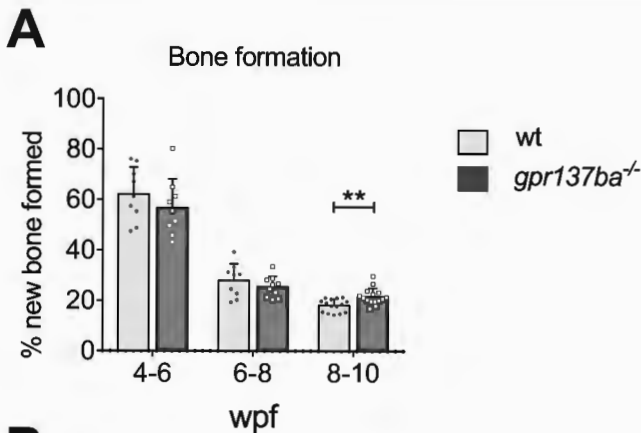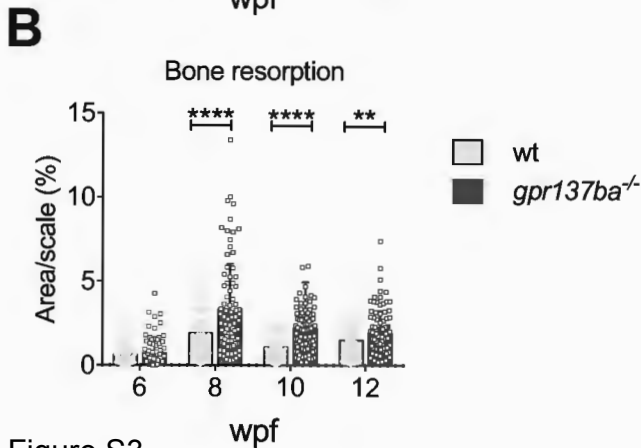

Figure S3

Supplement: NIHMS1531930-supplement-3.pdf [file NIHMS1531930-supplement-3.pdf]
